# Supplementary material
Source: publisher figshare collection journal article supplement (https://gsajournals.figshare.com/articles/dataset/_/6854819)

**A**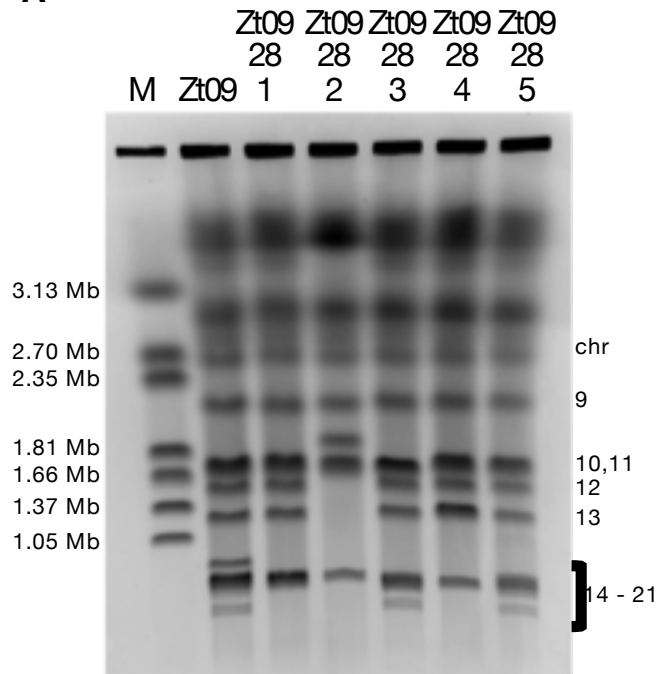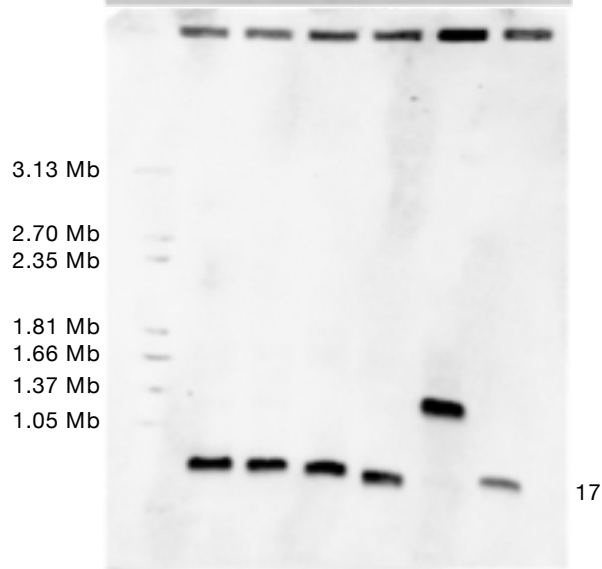**B**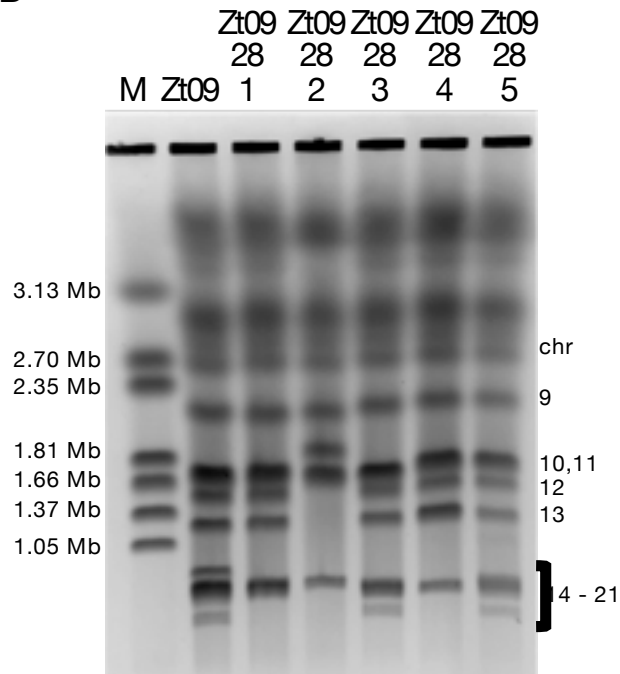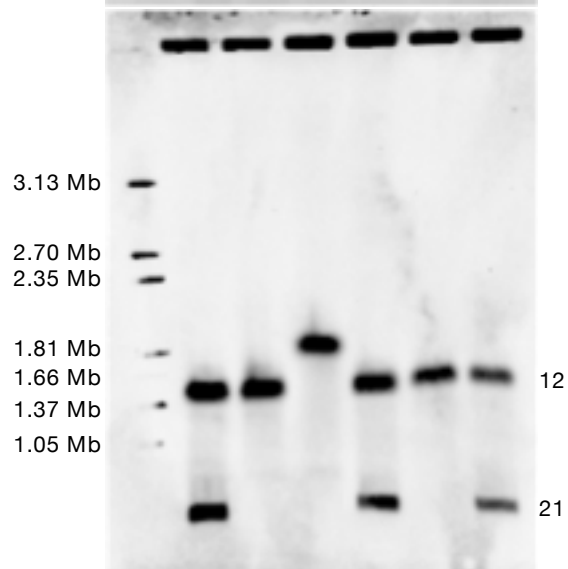

Supplement: Supplementary file 1 [file 1]

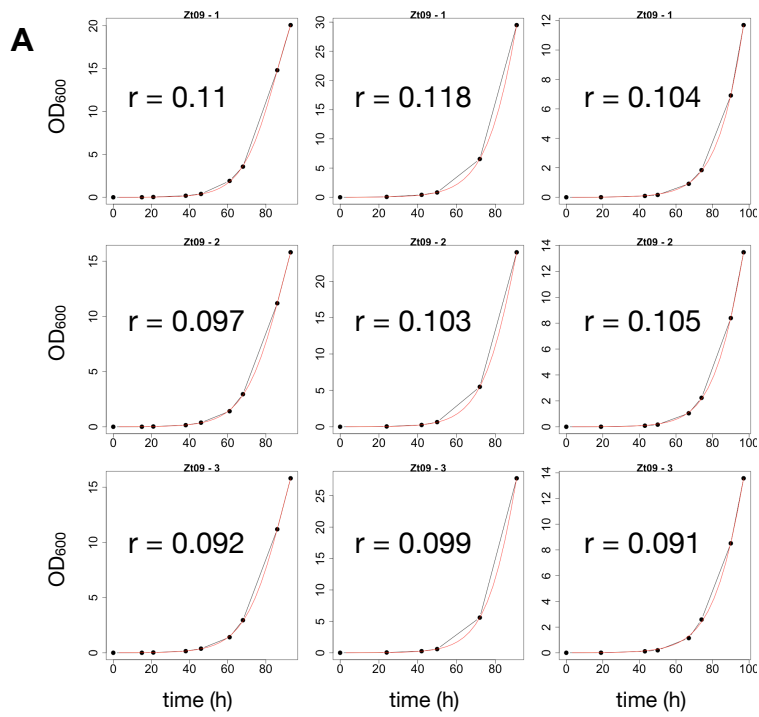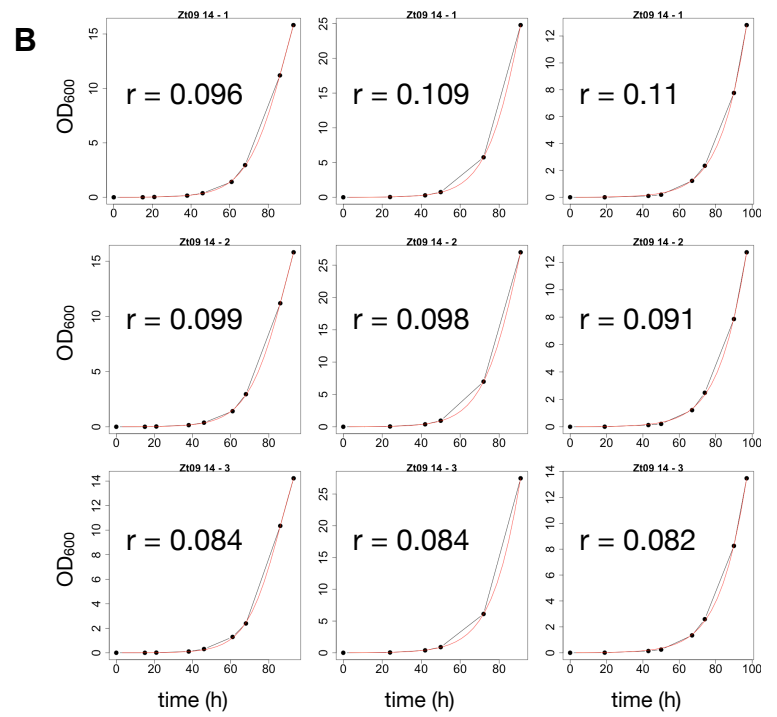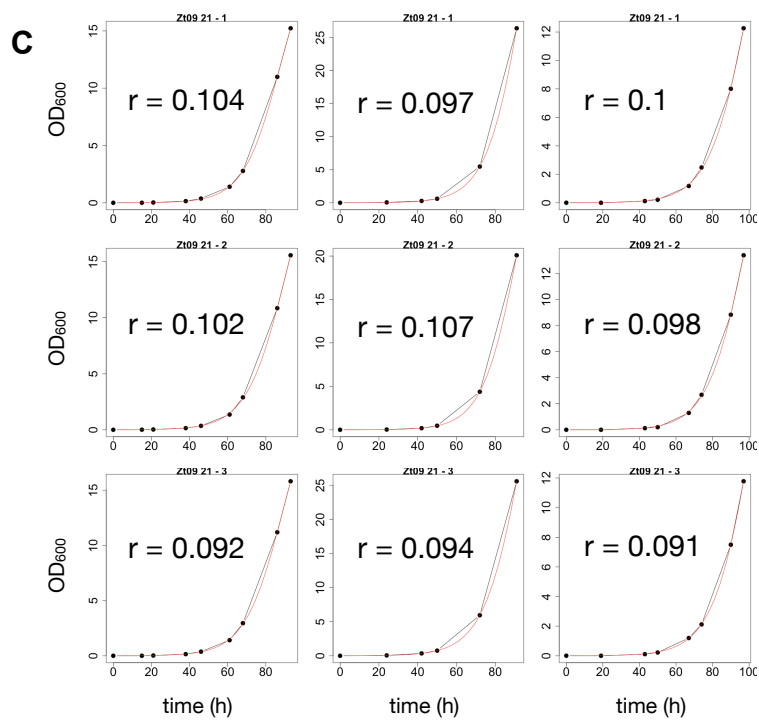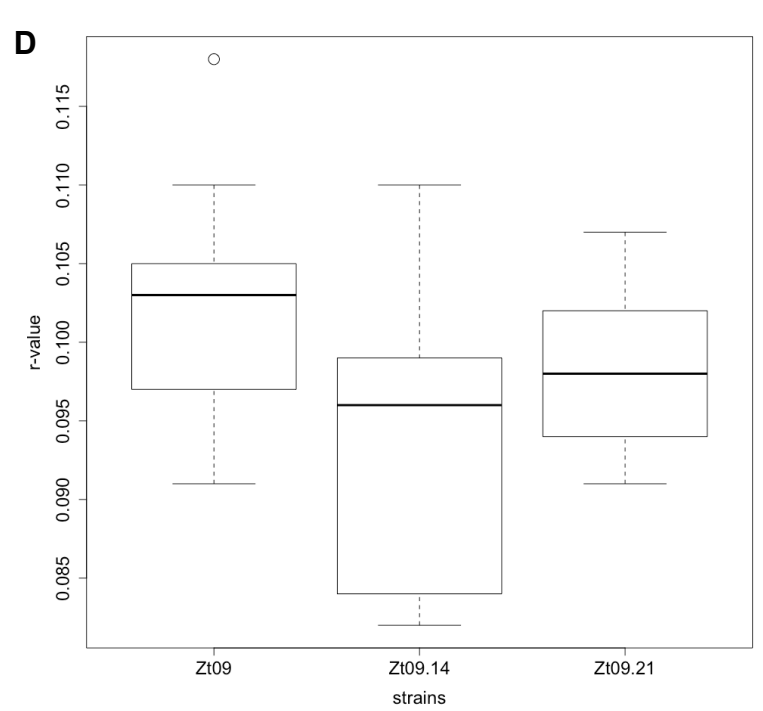

Supplement: Supplementary file 2 [file 1]
